# Supplementary material for: High-Throughput Particle Concentration Using Complex Cross-Section Microchannels
Source: PubMed Central journal article supplement (PMC7231362; doi:10.3390/mi11040440), 2020-04-22
Supplement: micromachines-11-00440-s001.pdf [file micromachines-11-00440-s001.pdf]

# Supplementary Materials: High-Throughput Particle Concentration Using Complex Cross-Section Microchannels

Asma Mihandoust <sup>1</sup>, Sajad Razavi Bazaz <sup>2</sup>, Nahid Maleki-Jirsaraei <sup>1</sup>, Majid Alizadeh <sup>3</sup>, Robert A. Taylor <sup>4</sup> and Majid Ebrahimi Warkiani <sup>2,5,\*</sup>

<sup>1</sup> Complex Systems Laboratory, School of Physics-Chemistry, Department of Physics, Alzahra University, Tehran 1993893973, Iran; a.mihandoust@alzahra.ac.ir (A.M.); maleki@alzahra.ac.ir (N.M.-J.)

<sup>2</sup> School of Biomedical Engineering, University of Technology Sydney, Sydney, NSW 2007, Australia; sajad.razavibazaz@student.uts.edu.au

<sup>3</sup> School of Paramedicine, Ilam University of Medical Science, Ilam 6939177143, Iran; alizadeh\_majid@ymail.com

<sup>4</sup> School of Mechanical and Manufacturing Engineering, University of New South Wales, Sydney, NSW 2052, Australia; robert.taylor@unsw.edu.au

<sup>5</sup> Institute of Molecular Medicine, Sechenov University, Moscow 119991, Russia

\* Correspondence: majid.warkiani@uts.edu.au

Received: 24 March 2020; Accepted: 20 April 2020; Published: date

## Calculation of Focusing Number of Complex cross-section (FNC):

The FNC number of the spiral microchannel can be obtained as follows:

$$FNC = \cot \alpha \cdot \frac{w_R}{w_T} \quad (S-1)$$

Where  $\alpha$  is the angle between sloping side and the horizontal line,  $w_R$  is the devoted width to the trapezoidal shape, and  $w_T$  is the devoted width to the rectangular shape. The value of FNC affects the threshold of sample flow rates to start the de-focusing of particles from equilibrium positions and moves to the higher flow rates within microchannel with large amount of FNC.

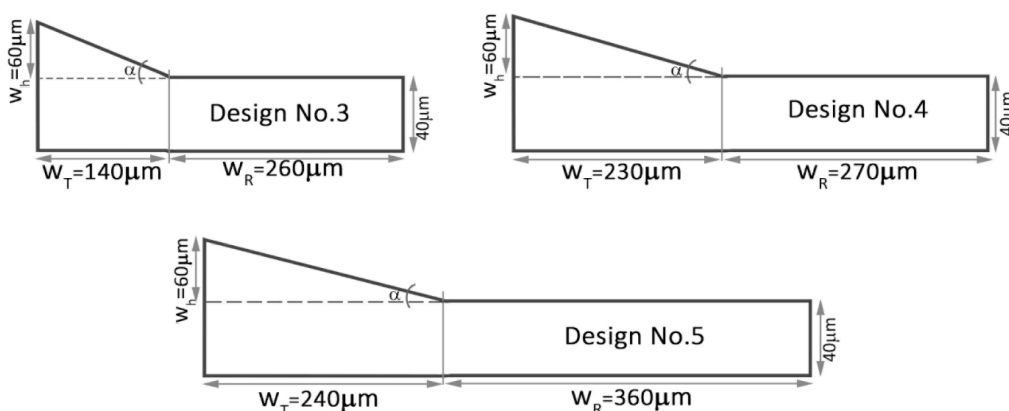

**Figure S1.** Schematic of complex cross-sectional channels illustrating dimensional characteristic.

The FNC number of complex cross-sectional channels can be estimated as follow:

Channel Design No. 3:

$$FNC = \cot \alpha \cdot \frac{w_R}{w_T} \quad (S-2)$$

$$FNC = \frac{140}{60} \cdot \frac{260}{140} = 4.3 \quad (S-3)$$

Channel Design No. 4:

$$FNC = \cot \alpha \cdot \frac{W_R}{W_T} \quad (S-4)$$

$$FNC = \frac{230}{60} \cdot \frac{270}{230} = 4.5 \quad (S-5)$$

Channel Design No. 5:

$$FNC = \cot \alpha \cdot \frac{W_R}{W_T} \quad (S-6)$$

$$FNC = \frac{240}{60} \cdot \frac{360}{240} = 6 \quad (S-7)$$

The FNC number can be written as

$$FNC = \cot \alpha \cdot \frac{W_R}{W_T} = \frac{W_T}{W_h} \cdot \frac{W_R}{W_T} = \frac{W_R}{W_h} \quad (S-8)$$

Therefore, regarding (S-8), the FNC can be obtained as

$$FNC = \frac{W_R}{W_h} \quad (S-9)$$

The above formula can be considered for complex cross sectional channels, combination of trapezoidal and rectangular sections.
